# Supplementary material for: Protein binding by dinuclear polypyridyl ruthenium(ii) complexes and the effect of cucurbit[10]uril encapsulation
Source: Royal Society of Chemistry journal article supplement (doi:10.1039/c3dt50551k), 2013-01-01
Supplement: c3dt50551k.pdf [file c3dt50551k.pdf]

## Electronic Supplementary Information

### Protein binding by dinuclear polypyridyl ruthenium(II) complexes and the effect of cucurbit[10]uril encapsulation

Fangfei Li,<sup>a</sup> Marshall Feterl,<sup>b,c</sup> Jeffrey M. Warner,<sup>b,c</sup> Anthony I. Day,<sup>a</sup>  
 F. Richard Keene<sup>c,d,e\*</sup> and J. Grant Collins<sup>a\*</sup>

**Table S1.** <sup>1</sup>H NMR chemical shifts of the aromatic protons of free ΔΔ-Rubb<sub>12</sub> and changes in chemical shift (Δδ) upon encapsulation by Q[10] after complete equilibrium. All chemical shifts are displayed in ppm. Negative numbers indicate an upfield shift.

|                    | Free<br>ΔΔ-Rubb <sub>12</sub> | Q[10]-bound<br>ΔΔ-Rubb <sub>12</sub> | Δδ             |
|--------------------|-------------------------------|--------------------------------------|----------------|
| <b>Mebpy</b>       |                               |                                      |                |
| H3                 | 8.39                          | 9.22                                 | 0.83           |
| H5                 | 6.17                          | 7.10                                 | 0.93           |
| H6                 | 6.93                          | 7.41                                 | 0.48           |
| H3'                | 8.36                          | 7.93                                 | -0.43          |
| H5'                | 6.52                          | 5.80                                 | -0.72          |
| H6'                | 7.33                          | 7.16                                 | -0.17          |
| CH <sub>3</sub>    | 2.37                          | 2.64                                 | 0.27           |
| CH <sub>2</sub> a* | 2.58                          | 2.36/1.19                            | -0.22/-1.39    |
| CH <sub>2</sub> b* | 2.44                          | 0.98/0.77                            | -1.46/-1.67    |
| CH <sub>2</sub> c* | 1.17                          | -0.12/-0.36                          | -1.29/-1.53    |
| CH <sub>2</sub> d* | 0.98                          | -0.69                                | -1.67          |
| CH <sub>2</sub> e* | 0.77                          | -0.23                                | -1.00          |
| CH <sub>2</sub> f* | 0.72                          | -0.58                                | -1.30          |
| <b>Phen A</b>      |                               |                                      |                |
| H2                 | 8.14                          | 7.98                                 | -0.16          |
| H3                 | 7.75                          | 8.12                                 | 0.37           |
| H4                 | 8.64                          | 8.69                                 | 0.05           |
| H5                 | 8.21                          | 8.21                                 | 0/0.1          |
| H6                 | 8.17                          | 8.21(or 8.31)                        | 0.04 (or 0.14) |
| H7                 | 8.26                          | 8.69                                 | 0.43           |
| H8                 | 7.85                          | 7.91                                 | 0.06           |
| H9                 | 8.61                          | 9.33                                 | 0.72           |
| <b>Phen B</b>      |                               |                                      |                |
| H2                 | 7.95                          | 7.85                                 | -0.10          |
| H3                 | 7.55                          | 7.48                                 | -0.07          |
| H4                 | 8.55                          | 8.52                                 | -0.03          |
| H5                 | 8.17                          | 8.22                                 | 0.05           |
| H6                 | 8.19                          | 8.21(or 8.31)                        | 0.02 (or 0.12) |
| H7                 | 8.46                          | 8.69                                 | 0.23           |
| H8                 | 7.42                          | 7.67                                 | 0.25           |
| H9                 | 7.80                          | 8.10                                 | 0.30           |

\* The CH<sub>2</sub> protons adjacent to bipyridine are nominated as CH<sub>2</sub>a, and the CH<sub>2</sub> protons in the middle of the methylene chain are nominated as CH<sub>2</sub>f.
